# Supplementary material
Source: Springer Nature journal article supplement (https://www.springermedizin.de/resource/supplementary/12933_2014_832_MOESM3_ESM.pdf/9539342)

# HR vs. 3<sup>rd</sup> tertile

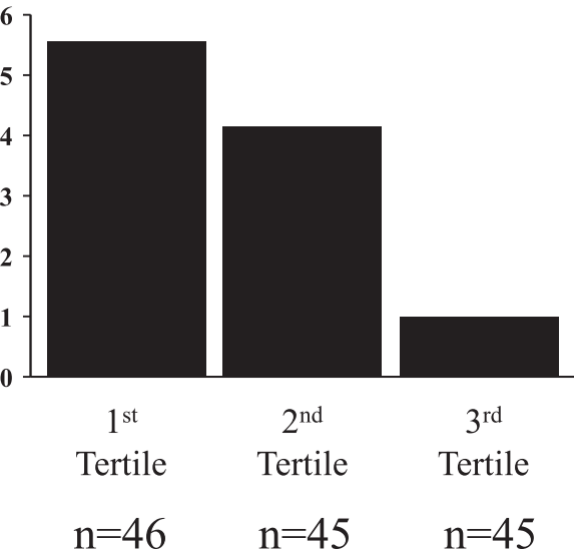

Supplement: MOESM3 [file 9539342]
